# Supplementary material for: Central European Early Bronze Age chronology revisited: A Bayesian examination of large-scale radiocarbon dating
Source: PLoS One. 2020 Dec 28;15(12):e0243719. doi: 10.1371/journal.pone.0243719 (PMC7769557; doi:10.1371/journal.pone.0243719)
Supplement: S3 Data — List of all sites and burials with eyelet pins used in the analysis with their radiocarbon dates. (CSV) [file pone.0243719.s008.csv]

ID	Site	14C	y	x	eyled pin type
1	Eulau, Gräberfeld 3, Grab 4 (Bef. 338)	3626±26 BP (KIA 26654)	51.1789771	11.8495709	2
2	Schiepzig,Steinpackungsgrab	3623 ± 26 BP (MAMS 13424) (Moser in Vorb.)	51.5242848	11.8525482	1 (schlecht erkennbar, da zu Pfriem geschäftet)
3	Eulau,Gräberfeld 7, Bef. 1	3620±28 BP (KIA 26669)	51.1789771	11.8495709	2
4	Oechlitz,Erdgrab Bef. 25942	3613±25 BP (MAMS 17231)	51.3235795	11.7622151	3
5	Praha-Miškovice, Grab 8	3615±30 BP (KIA 35076)	50.156304	14.542254	3
6	Eulau, Gräberfeld 4, Erdgrab Bef. 492	3601±25 BP (KIA 26658)	51.1789771	11.8495709	3
7	Praha-Miškovice, Grab 21	3591±20 BP (KIA 30943, KIA 35708)	50.156304	14.542254	2
8	Leubingen, Grabhügel	1942±10 (Dendro)	51.1997845	11.1535711	3
9	Praha-Miškovice, Grab 19	3560±30 BP (KIA 35078)	50.156304	14.542254	3
10	Stöbnitztal/Oberwünsch,ICE-Trasse, Grab (rechter Hocker), Bef. 290	3553 ± 19 (MAMS 18165)	51.3505136	11.7816063	3
11	Dörstewitz/Schkopau, Erdgrab Bef. 80189	3549 ± 19 BP (MAMS 18128)	51.39677	11.9175893	2
12	Stedten	3540 ± 25 MAMS-17243	51.441921	11.688878	?
13	Praha-Miškovice, Grab 33	3535±35 BP (KIA 35082)	50.156304	14.542254	2
14	Dörstewitz/Schkopau, Erdgrab Bef. 80198	3529 ± 18 BP (MAMS 18129)	51.39677	11.9175893	3
15	Praha-Miškovice, Grab 32	3516±24 (KIA 35081, Utc 13191)	50.156304	14.542254	1
16	Benzingerode, Grab 14	3502 ± 23 BP (KIA 27959)	51.8331385	10.8631631	2
17	Helmsdorf, Grabhügel	1840±10 (Dendro)	51.604399	11.612395	3
18	Eulau, Gräberfeld 3, Grab 5 (Bef. 342)	3519 ± 26 KIA-26660	51.1789771	11.8495709	?
19	Eulau, Gräberfeld 3, Grab 5 (Bef. 342)	3495±26 (KIA 26655)	51.1789771	11.8495709	1
20	Bad Lauchstädt, Grab Bef. 60483	3480 ± 23 BP (MAMS 12399)	51.3924215	11.8204814	1
21	Spiez-Einigen, Grab 2	3475±55 BP (ETH 15180)	46.70923	7.64521	1
22	Bad Lauchstädt, Grab Bef. 60481	3474 ± 30 BP (MAMS 12397)	51.3924215	11.8204814	3
23	Bad Lauchstädt, Grab gestört, Bef. 60651	3473 ± 23 BP (MAMS 12401)	51.3924215	11.8204814	1
24	Kleinaitingen, Gewerbegbiet Nord G 37	3470±27 (MAMS 21594)	48.22281	10.84499	?
25	Spiez-Einigen, Grab 1	3455±55 BP (ETH 15179)	46.70923	7.64521	1
26	Krajeńskie,Hexenberg, Grab 91	3380±60 (KIA 11004)	53.1662	16.607	?
27	Spiez-Einigen, Grab 2008.1	3390±35 BP (ETH 39465) 3135±50 BP (ETH 36588)	46.70923	7.64521	1
28	Donath-Surses, Grab 3A	3289±36 (BE-6718.1.1), 3358±36 (BE-6719.1.1)	46.6285712	9.4275113	1
29	Spiez-Einigen, Grab 2008.2	3310±25 BP (ETH 38654) 3185±50 BP (ETH 36589)	46.70923	7.64521	7
